# Supplementary material for: The Facile Synthesis of Branch-Trunk Ag Hierarchical Nanostructures and Their Applications for High-Performance H2O2 Electrochemical Sensors
Source: MDPI journal article supplement (doi:10.3390/s17122896), 2017-12-13
Supplement: s1 [file s1]

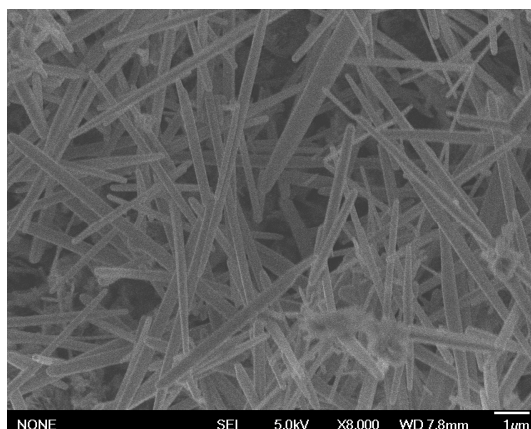

**Figure S1.** Typical SEM images of Te nanowires.

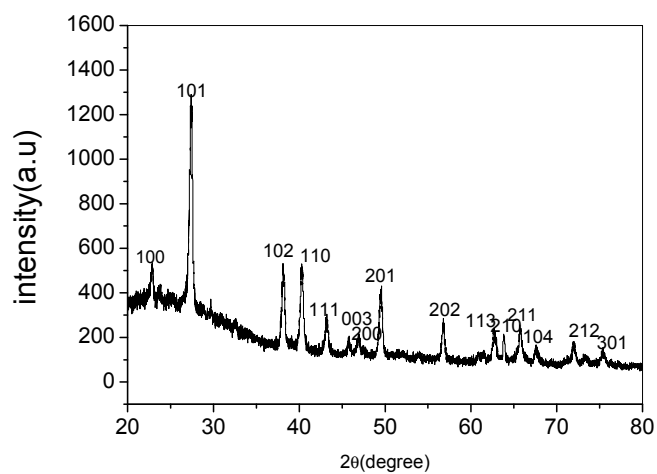

**Figure S2.** XRD patterns of Te nanowires.

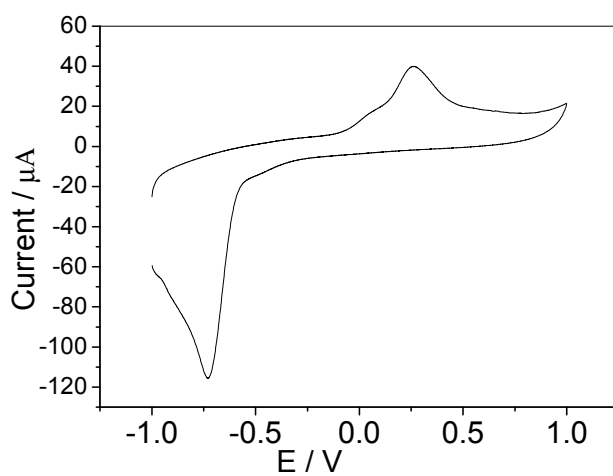

**Figure S3.** CVs of Te nanowires in 0.1M PBS solution (pH=7.4), Scan rate: 50mVs<sup>-1</sup>.

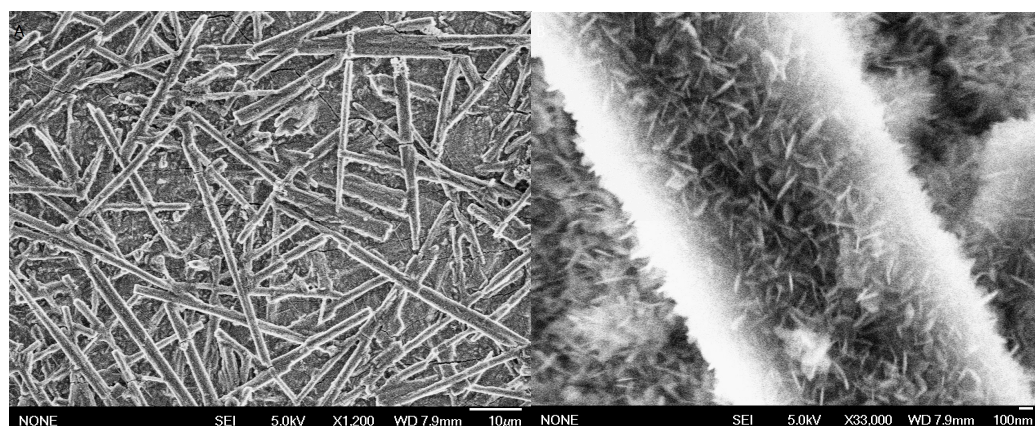

**Figure S4** A and B SEM images of Ag nanoplates on nanowires with different magnification.

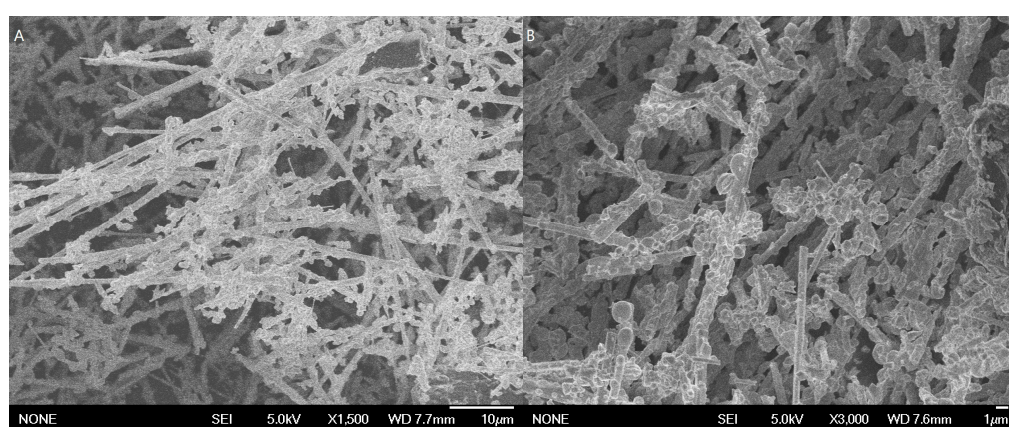

**Figure S5.** A and B SEM images of Ag nanoparticle on nanowires with different magnification.
